# Supplementary material for: Serum Neurofilament Light Chain as Biomarker for Cladribine-Treated Multiple Sclerosis Patients in a Real-World Setting
Source: MDPI journal article supplement (doi:10.3390/ijms24044067), 2023-02-17
Supplement: s1 [file s1]

**Suppl. Figure S1.** Disease course and sNfL of the individual patients (n = 14) receiving CLAD therapy.  
- NEDA-3 achieved

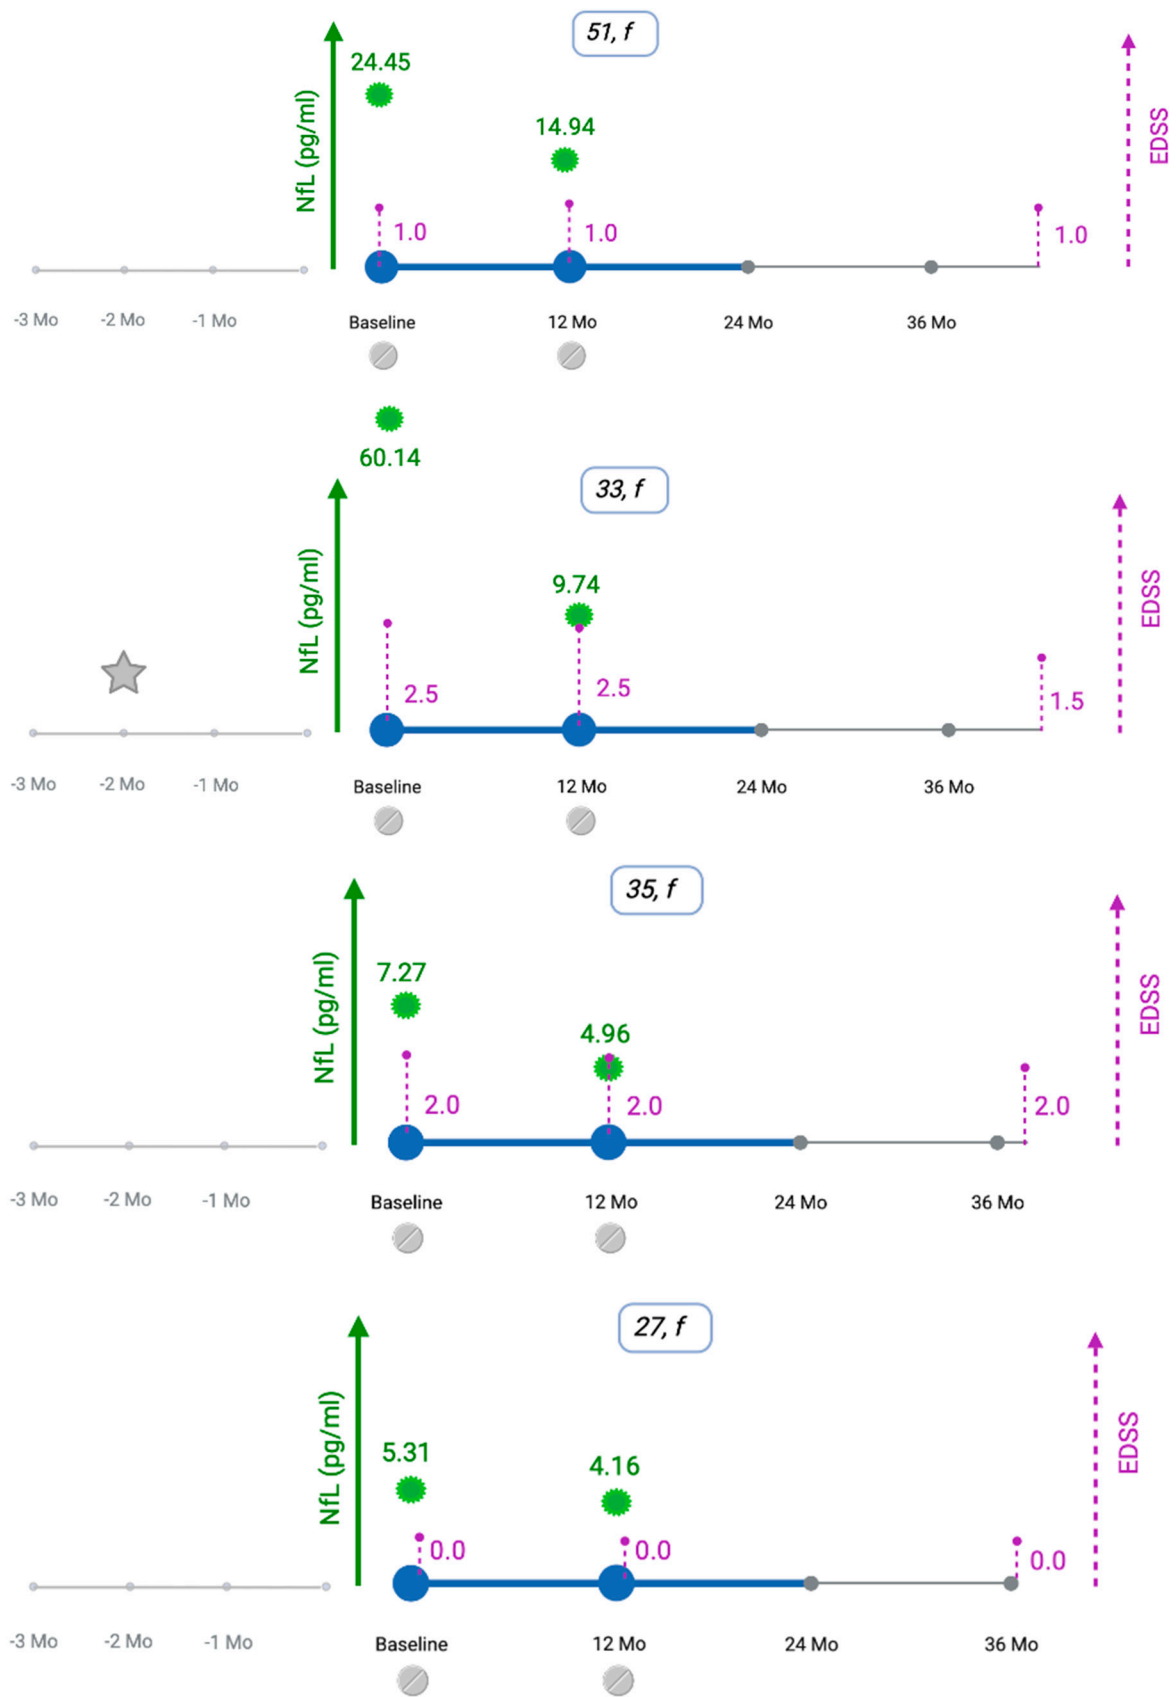

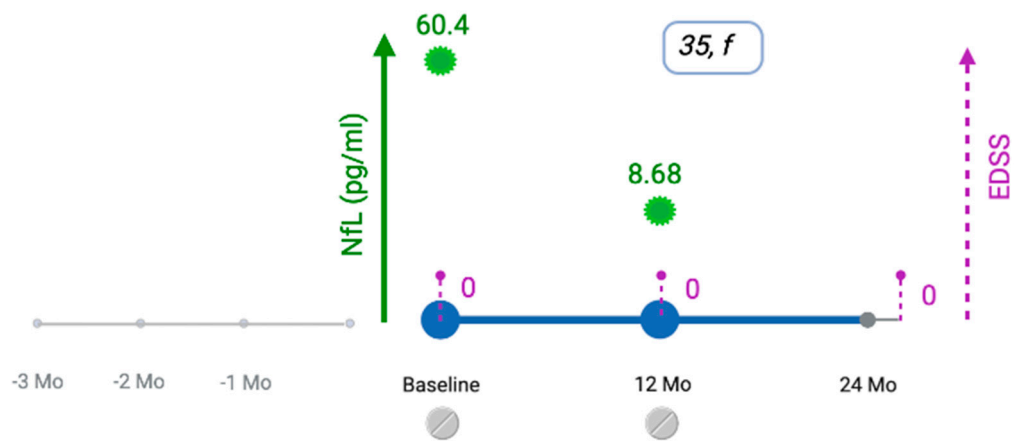

- No NEDA-3:

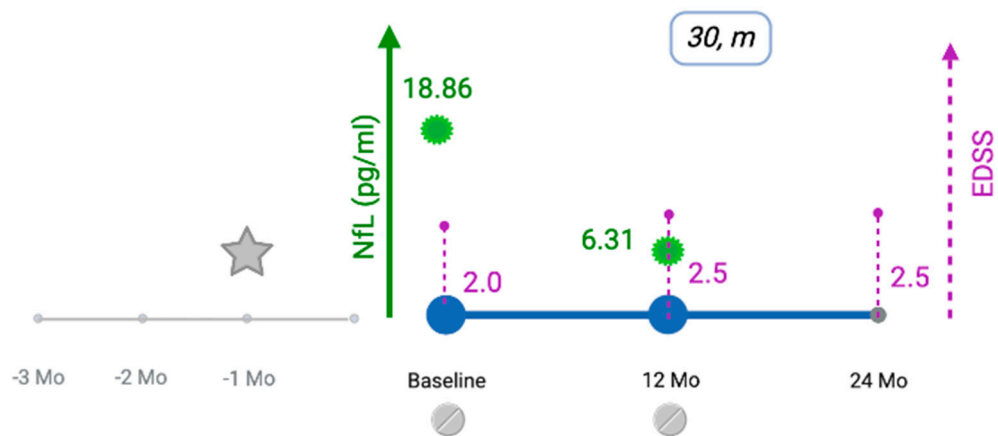

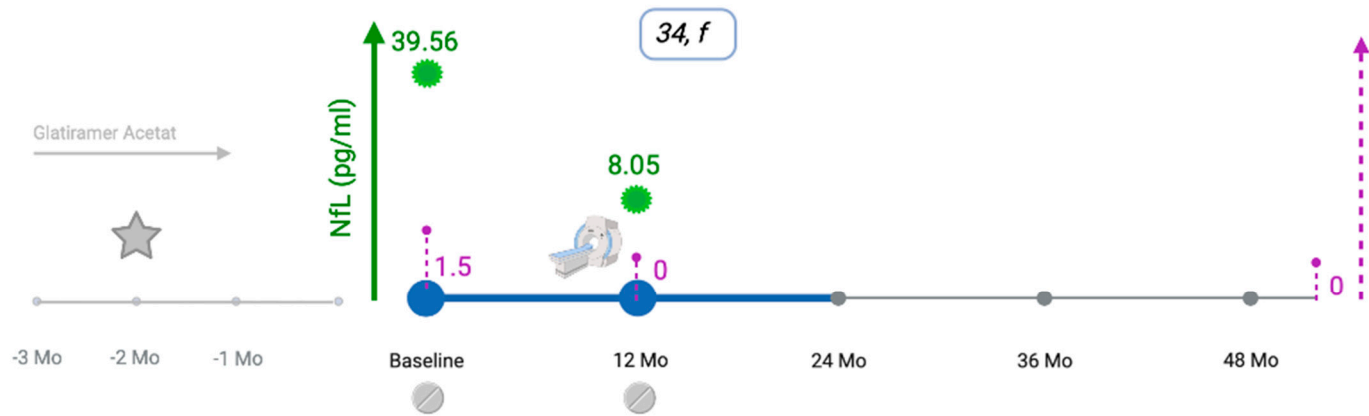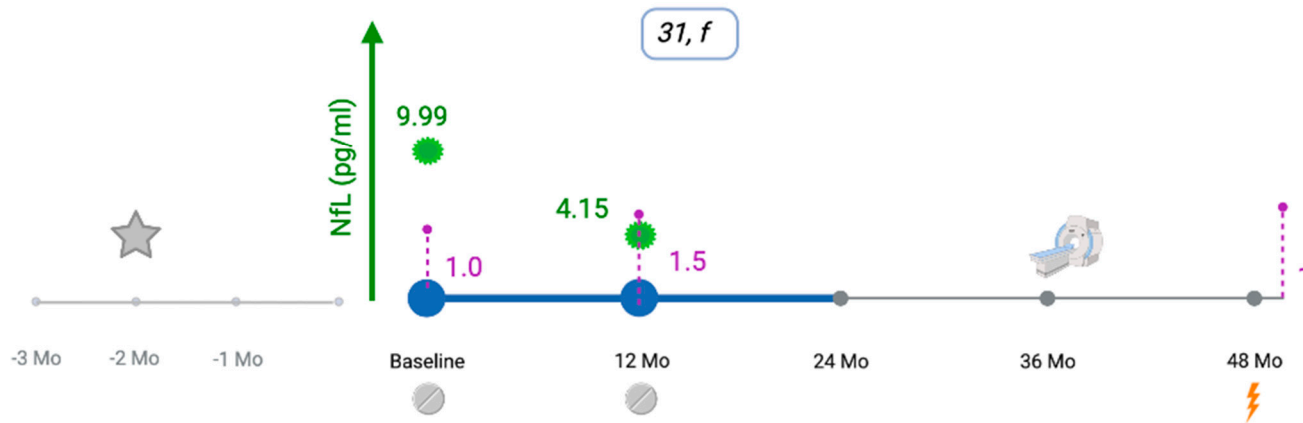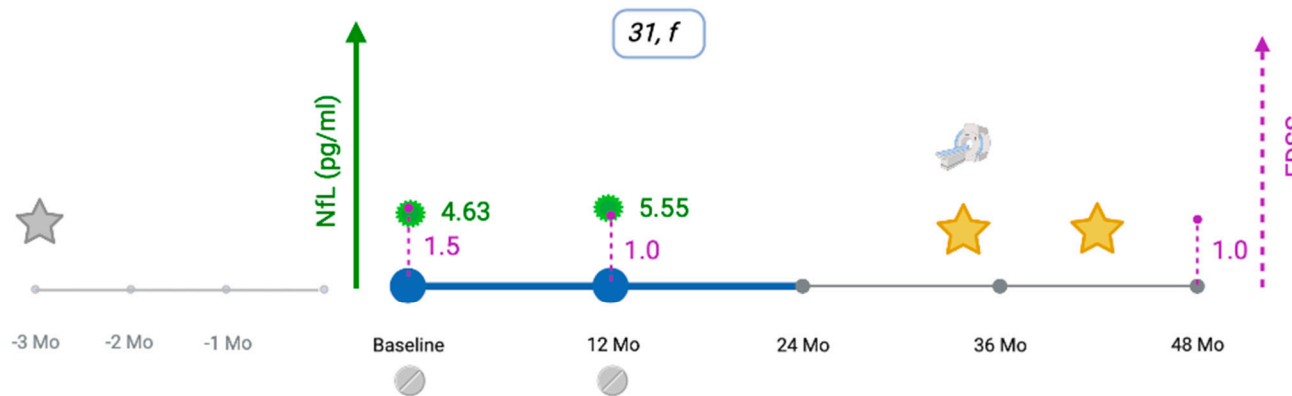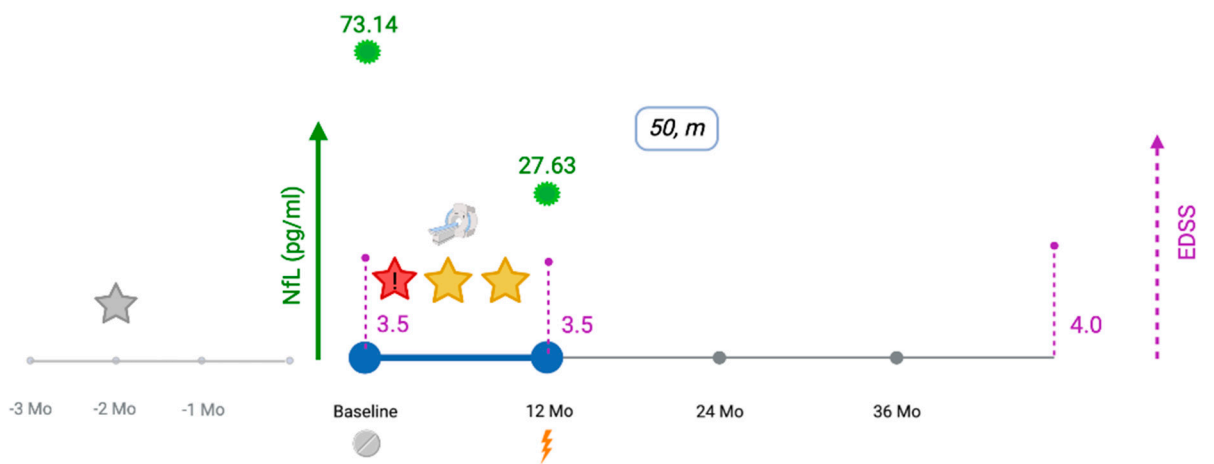

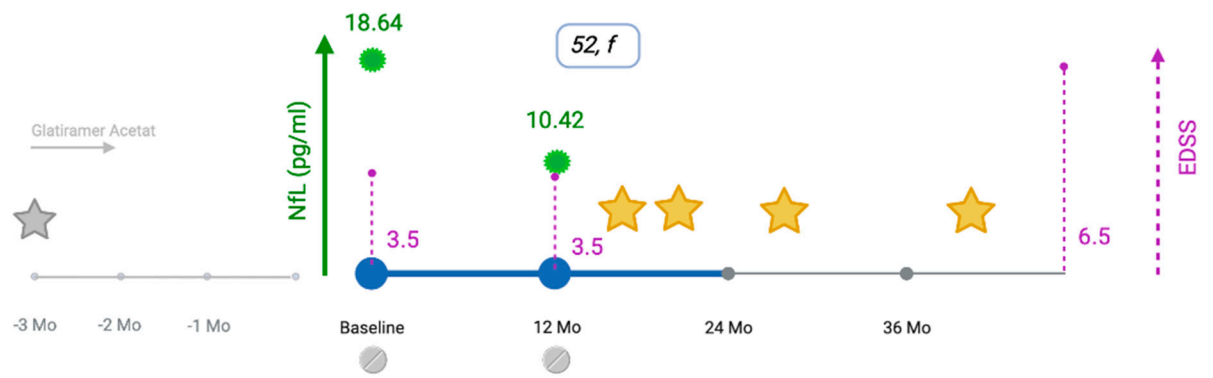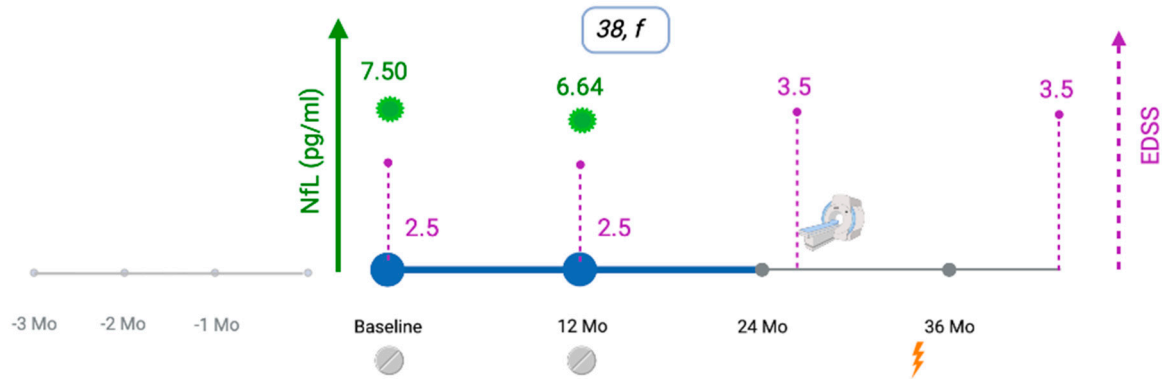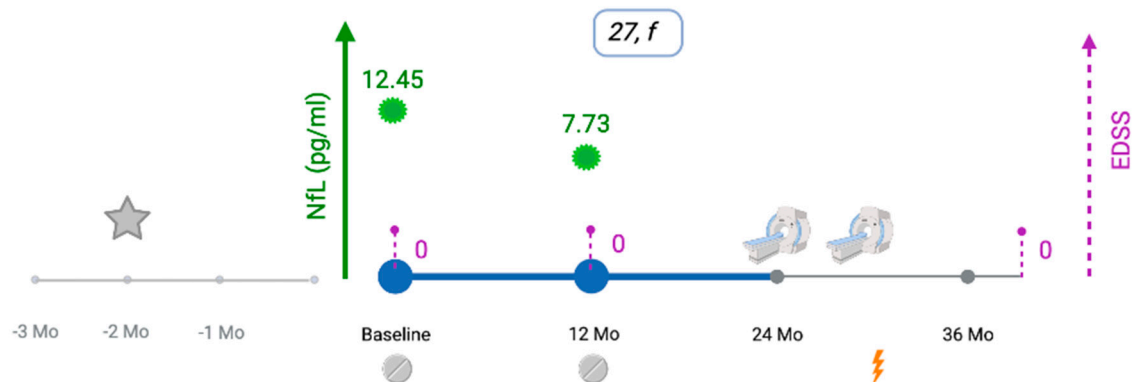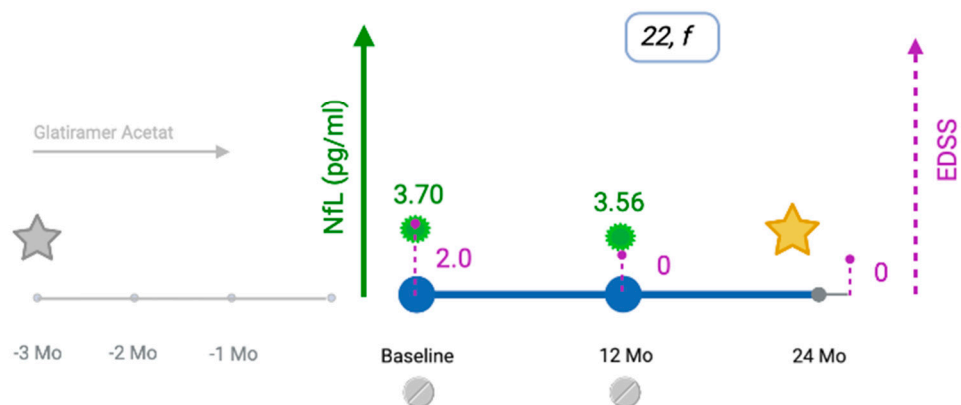

|                                                                                   |               |                                                                                   |                  |
|-----------------------------------------------------------------------------------|---------------|-----------------------------------------------------------------------------------|------------------|
|  | severe relaps |  | Cladribine cycle |
|  | relaps        |  | sNfL             |
|  | MRI activity  |  | Treatment switch |

NEDA: no evidence of disease activity
